# Supplementary material for: Encountering Parents Who Are Hesitant or Reluctant to Vaccinate Their Children: A Meta-Ethnography
Source: MDPI journal article supplement (doi:10.3390/ijerph18147584), 2021-07-16
Supplement: s1 [file s1]

## Supplementary Materials

**Table S1. eMERGe Guideline**

| No.                                                           | Criteria Headings                              | Reporting Criteria                                                                                                            | Meta-ethnography – criteria met (Page No) |
|---------------------------------------------------------------|------------------------------------------------|-------------------------------------------------------------------------------------------------------------------------------|-------------------------------------------|
| <b>Phase 1—Selecting meta-ethnography and getting started</b> |                                                |                                                                                                                               |                                           |
| <i>Introduction</i>                                           |                                                |                                                                                                                               |                                           |
| 1                                                             | Rationale and context for the meta-ethnography | Describe the gap in research or knowledge to be filled by the meta-ethnography, and the wider context of the meta-ethnography | Page 1-2                                  |
| 2                                                             | Aim(s) of the meta-ethnography                 | Describe the meta-ethnography aim(s)                                                                                          | Page 2                                    |
| 3                                                             | Focus of the meta-ethnography                  | Describe the meta-ethnography review question(s) (or objectives)                                                              | Page 2                                    |
| 4                                                             | Rationale for using meta-ethnography           | Explain why meta-ethnography was considered the most appropriate qualitative synthesis methodology                            | Pages 2; 17-18                            |
| <b>Phase 2—Deciding what is relevant</b>                      |                                                |                                                                                                                               |                                           |
| <i>Methods</i>                                                |                                                |                                                                                                                               |                                           |
| 5                                                             | Search strategy                                | Describe the rationale for the literature search strategy                                                                     | Page 2                                    |
| 6                                                             | Search processes                               | Describe how the literature searching was carried out and by whom                                                             | Page 2 -3                                 |
| 7                                                             | Selecting primary studies                      | Describe the process of study screening and selection, and who was involved                                                   | Page 2 -3                                 |
| <i>Findings</i>                                               |                                                |                                                                                                                               |                                           |
| 8                                                             | Outcome of study selection                     | Describe the results of study searches and screening                                                                          | Page 13                                   |
| <b>Phase 3—Reading included studies</b>                       |                                                |                                                                                                                               |                                           |
| <i>Methods</i>                                                |                                                |                                                                                                                               |                                           |
| 9                                                             | Reading and data extraction approach           | Describe the reading and data extraction method and processes                                                                 | Page 4-12                                 |
| <i>Findings</i>                                               |                                                |                                                                                                                               |                                           |
| 10                                                            | Presenting characteristics of included studies | Describe characteristics of the included studies                                                                              | Page 13, Table 2                          |
| <b>Phase 4—Determining how studies are related</b>            |                                                |                                                                                                                               |                                           |
| <i>Methods</i>                                                |                                                |                                                                                                                               |                                           |

|                                                     |                                                 |                                                                                                                                                                                                                                                                                                                                                      |               |
|-----------------------------------------------------|-------------------------------------------------|------------------------------------------------------------------------------------------------------------------------------------------------------------------------------------------------------------------------------------------------------------------------------------------------------------------------------------------------------|---------------|
| 11                                                  | Process for determining how studies are related | Describe the methods and processes for determining how the included studies are related:<br>- Which aspects of studies were compared<br>AND<br>- How the studies were compared                                                                                                                                                                       | Page 4-12     |
| <i>Findings</i>                                     |                                                 |                                                                                                                                                                                                                                                                                                                                                      |               |
| 12                                                  | Outcome of relating studies                     | Describe how studies relate to each other                                                                                                                                                                                                                                                                                                            | Pages 13-16   |
| <b>Phase 5—Translating studies into one another</b> |                                                 |                                                                                                                                                                                                                                                                                                                                                      |               |
| <i>Methods</i>                                      |                                                 |                                                                                                                                                                                                                                                                                                                                                      |               |
| 13                                                  | Process of translating studies                  | Describe the methods of translation:<br>- Describe steps taken to preserve the context and meaning of the relationships between concepts within and across studies- Describe how the reciprocal and refutational translations were conducted- Describe how potential alternative interpretations or explanations were considered in the translations | Pages 4 - 12  |
| <i>Findings</i>                                     |                                                 |                                                                                                                                                                                                                                                                                                                                                      |               |
| 14                                                  | Outcome of translation                          | Describe the interpretive findings of the translation.                                                                                                                                                                                                                                                                                               | Pages 13-16   |
| <b>Phase 6—Synthesizing translations</b>            |                                                 |                                                                                                                                                                                                                                                                                                                                                      |               |
| <i>Methods</i>                                      |                                                 |                                                                                                                                                                                                                                                                                                                                                      |               |
| 15                                                  | Synthesis process                               | Describe the methods used to develop overarching concepts (“synthesised translations”) Describe how potential alternative interpretations or explanations were considered in the synthesis                                                                                                                                                           | Page 4-12     |
| <i>Findings</i>                                     |                                                 |                                                                                                                                                                                                                                                                                                                                                      |               |
| 16                                                  | Outcome of synthesis process                    | Describe the new theory, conceptual framework, model, configuration, or interpretation of data developed from the synthesis                                                                                                                                                                                                                          | Pages 13-16   |
| <b>Phase 7—Expressing the synthesis</b>             |                                                 |                                                                                                                                                                                                                                                                                                                                                      |               |
| <i>Discussion</i>                                   |                                                 |                                                                                                                                                                                                                                                                                                                                                      |               |
| 17                                                  | Summary of findings                             | Summarize the main interpretive findings of the translation and synthesis and compare them to existing literature                                                                                                                                                                                                                                    | Pages 16 - 18 |
| 18                                                  | Strengths, limitations, and reflexivity         | Reflect on and describe the strengths and limitations of the synthesis:<br>- Methodological aspects—for example, describe how the synthesis findings were influenced by the nature of the included studies and how the meta-ethnography was conducted.- Reflexivity—for example, the impact of the research team on the synthesis findings           | Pages 17 - 18 |

|    |                                 |                                            |               |
|----|---------------------------------|--------------------------------------------|---------------|
| 19 | Recommendations and conclusions | Describe the implications of the synthesis | Pages 16 - 18 |
|----|---------------------------------|--------------------------------------------|---------------|

**Table S2.** Search strategy

| Pubmed                                                                                                                                                                                                                                                                                         |                                                                                                                                                         |  |
|------------------------------------------------------------------------------------------------------------------------------------------------------------------------------------------------------------------------------------------------------------------------------------------------|---------------------------------------------------------------------------------------------------------------------------------------------------------|-------------------------------------------------------------------------------------|
| #1                                                                                                                                                                                                                                                                                             | ("Parents"[Mesh] OR "Nurses"[Mesh] OR "Health Personnel"[Mesh]) AND (perspective*)                                                                      | 22,229                                                                              |
| #2                                                                                                                                                                                                                                                                                             | view* [tw]                                                                                                                                              | 436,820                                                                             |
| #3                                                                                                                                                                                                                                                                                             | opinion* [tw]                                                                                                                                           | 93,037                                                                              |
| #4                                                                                                                                                                                                                                                                                             | experienc* [tw]                                                                                                                                         | 1,020,920                                                                           |
| #5                                                                                                                                                                                                                                                                                             | "Attitude"[Mesh]                                                                                                                                        | 538,634                                                                             |
| #6                                                                                                                                                                                                                                                                                             | "Know" [tw]                                                                                                                                             | 82,980                                                                              |
| #7                                                                                                                                                                                                                                                                                             | OR #1 - #6                                                                                                                                              | 1,980,211                                                                           |
| (("Parents"[Mesh] OR "Nurses"[Mesh] OR "Health Personnel"[Mesh]) AND (perspective*)) [tw] OR view* [tw] OR opinion* [tw] OR experienc* [tw] OR "Attitude"[Mesh] OR "Know" [tw]                                                                                                                 |                                                                                                                                                         |                                                                                     |
| #8                                                                                                                                                                                                                                                                                             | "Health Personnel"[Mesh]                                                                                                                                | 458,885                                                                             |
| #9                                                                                                                                                                                                                                                                                             | "Physicians"[Mesh]                                                                                                                                      | 120,596                                                                             |
| #10                                                                                                                                                                                                                                                                                            | "Primary Health Care"[Mesh]                                                                                                                             | 147,051                                                                             |
| #11                                                                                                                                                                                                                                                                                            | "Nurses"[Mesh]                                                                                                                                          | 79,717                                                                              |
| #12                                                                                                                                                                                                                                                                                            | "Nursing Care"[Mesh]                                                                                                                                    | 113,436                                                                             |
| #13                                                                                                                                                                                                                                                                                            | "Nursing"[Mesh]                                                                                                                                         | 211,270                                                                             |
| #14                                                                                                                                                                                                                                                                                            | "Nurse's Role"[Mesh]                                                                                                                                    | 37,960                                                                              |
| #15                                                                                                                                                                                                                                                                                            | "Physician's Role"[Mesh]                                                                                                                                | 26,695                                                                              |
| #16                                                                                                                                                                                                                                                                                            | "Nurse-Patient Relations"[Mesh]                                                                                                                         | 28,859                                                                              |
| #17                                                                                                                                                                                                                                                                                            | "Professional-Patient Relations"[Mesh]                                                                                                                  | 125,497                                                                             |
| #18                                                                                                                                                                                                                                                                                            | "Parents"[Mesh]                                                                                                                                         | 104,160                                                                             |
| #19                                                                                                                                                                                                                                                                                            | OR #8 - #18                                                                                                                                             | 952,863                                                                             |
| "Health Personnel"[Mesh] OR "Physicians"[Mesh] OR "Primary Health Care"[Mesh] OR "Nurses"[Mesh] OR "Nursing Care"[Mesh] OR "Nursing"[Mesh] OR "Nurse's Role"[Mesh] OR "Physician's Role"[Mesh] OR "Nurse-Patient Relations"[Mesh] OR "Professional-Patient Relations"[Mesh] OR "Parents"[Mesh] |                                                                                                                                                         |                                                                                     |
| #20                                                                                                                                                                                                                                                                                            | ((vaccin* OR immunis* OR immuniz*) AND (anti-vaccin* OR Rejection OR refus* OR mandatory OR criticis* OR hesitanc* OR doubt* OR refrain OR opposition)) | 9,515                                                                               |
| #21                                                                                                                                                                                                                                                                                            | "Anti-Vaccination Movement"[Mesh]                                                                                                                       | 51                                                                                  |
| #22                                                                                                                                                                                                                                                                                            | "Vaccination Refusal"[Mesh]                                                                                                                             | 237                                                                                 |
| #23                                                                                                                                                                                                                                                                                            | "non-vaccination" [tw]                                                                                                                                  | 320                                                                                 |
| #24                                                                                                                                                                                                                                                                                            | OR #23 - #26                                                                                                                                            | 9,839                                                                               |
| (((vaccin* OR immunis* OR immuniz*) AND (anti-vaccin* OR Rejection OR refus* OR mandatory OR criticis* OR hesitanc* OR doubt* OR refrain OR opposition)) OR "Anti-Vaccination Movement"[Mesh] OR "Vaccination Refusal"[Mesh] OR "non-vaccination" [tw])                                        |                                                                                                                                                         |                                                                                     |
| #25                                                                                                                                                                                                                                                                                            | "Qualitative Research" [Mesh]                                                                                                                           | 50,914                                                                              |
| #26                                                                                                                                                                                                                                                                                            | "qualitative" [tw]                                                                                                                                      | 230,087                                                                             |
| #27                                                                                                                                                                                                                                                                                            | "phenomenolog*" [tw]                                                                                                                                    | 25,174                                                                              |

|                                                                                                                                                                                                                                                                                                                                                                                                                                                                                                                                                                                                                                                                                                                                                                                                                                                                                                                                                                                      |                        |         |
|--------------------------------------------------------------------------------------------------------------------------------------------------------------------------------------------------------------------------------------------------------------------------------------------------------------------------------------------------------------------------------------------------------------------------------------------------------------------------------------------------------------------------------------------------------------------------------------------------------------------------------------------------------------------------------------------------------------------------------------------------------------------------------------------------------------------------------------------------------------------------------------------------------------------------------------------------------------------------------------|------------------------|---------|
| #28                                                                                                                                                                                                                                                                                                                                                                                                                                                                                                                                                                                                                                                                                                                                                                                                                                                                                                                                                                                  | "grounded theory" [tw] | 11,177  |
| #29                                                                                                                                                                                                                                                                                                                                                                                                                                                                                                                                                                                                                                                                                                                                                                                                                                                                                                                                                                                  | "ethnograph*" [tw]     | 10,460  |
| #30                                                                                                                                                                                                                                                                                                                                                                                                                                                                                                                                                                                                                                                                                                                                                                                                                                                                                                                                                                                  | "interview*" [tw]      | 364,446 |
| #31                                                                                                                                                                                                                                                                                                                                                                                                                                                                                                                                                                                                                                                                                                                                                                                                                                                                                                                                                                                  | "focus group*" [tw]    | 49,031  |
| #32                                                                                                                                                                                                                                                                                                                                                                                                                                                                                                                                                                                                                                                                                                                                                                                                                                                                                                                                                                                  | "Narration"[Mesh]      | 7,972   |
| #33                                                                                                                                                                                                                                                                                                                                                                                                                                                                                                                                                                                                                                                                                                                                                                                                                                                                                                                                                                                  | "narrative*" [tw]      | 38,612  |
| #34                                                                                                                                                                                                                                                                                                                                                                                                                                                                                                                                                                                                                                                                                                                                                                                                                                                                                                                                                                                  | OR #25 - #33           | 579,024 |
| "Qualitative Research" [Mesh] OR "qualitative" [tw] OR "phenomenolog*" [tw] OR "grounded theory" [tw] OR "ethnograph*" [tw] OR "interview*" [tw] OR "focus group*" [tw] OR "Narration"[Mesh] OR "narrative*" [tw]                                                                                                                                                                                                                                                                                                                                                                                                                                                                                                                                                                                                                                                                                                                                                                    |                        |         |
| #7 AND #19 AND #24 AND #34<br>Limits: Language: English, Portuguese and Spanish.                                                                                                                                                                                                                                                                                                                                                                                                                                                                                                                                                                                                                                                                                                                                                                                                                                                                                                     |                        |         |
| ((((("Parents"[Mesh] OR "Nurses"[Mesh] OR "Health Personnel"[Mesh]) AND (perspective*)) [tw] OR view* [tw] OR opinion* [tw] OR experienc* [tw] OR "Attitude"[Mesh] OR "Know" [tw])) AND ("Health Personnel"[Mesh] OR "Physicians"[Mesh] OR "Primary Health Care"[Mesh] OR "Nurses"[Mesh] OR "Nursing Care"[Mesh] OR "Nursing"[Mesh] OR "Nurse's Role"[Mesh] OR "Physician's Role"[Mesh] OR "Nurse-Patient Relations"[Mesh] OR "Professional-Patient Relations"[Mesh] OR "Parents"[Mesh])) AND (AND (((vaccin* OR immunis* OR immuniz*) AND (anti-vaccin* OR Rejection OR refus* OR mandatory OR criticis* OR hesitanc* OR doubt* OR refrain OR opposition)) OR "Anti-Vaccination Movement"[Mesh] OR "Vaccination Refusal"[Mesh] OR "non-vaccination" [tw]))) AND ("Qualitative Research" [Mesh] OR "qualitative" [tw] OR "phenomenolog*" [tw] OR "grounded theory" [tw] OR "ethnograph*" [tw] OR "interview*" [tw] OR "focus group*" [tw] OR "Narration"[Mesh] OR "narrative*" [tw]) |                        |         |
| TOTAL: 211                                                                                                                                                                                                                                                                                                                                                                                                                                                                                                                                                                                                                                                                                                                                                                                                                                                                                                                                                                           |                        |         |

| SCOPUS                                                                                                                                                                                                                     |                                                                                                                                                                     | Scopus®   |
|----------------------------------------------------------------------------------------------------------------------------------------------------------------------------------------------------------------------------|---------------------------------------------------------------------------------------------------------------------------------------------------------------------|-----------|
| #1                                                                                                                                                                                                                         | TITLE-ABS-KEY ("perspective*")                                                                                                                                      | 1,000,591 |
| #2                                                                                                                                                                                                                         | TITLE-ABS-KEY ("view*")                                                                                                                                             | 1,550,463 |
| #3                                                                                                                                                                                                                         | TITLE-ABS-KEY ("opinion*")                                                                                                                                          | 241,674   |
| #4                                                                                                                                                                                                                         | TITLE-ABS-KEY ("experienc*")                                                                                                                                        | 2,152,844 |
| #5                                                                                                                                                                                                                         | TITLE-ABS-KEY ("attitude*")                                                                                                                                         | 850,339   |
| #6                                                                                                                                                                                                                         | TITLE-ABS-KEY ("know")                                                                                                                                              | 271,848   |
| #7                                                                                                                                                                                                                         | OR #1 - #6                                                                                                                                                          | 5,312,936 |
| (TITLE-ABS-KEY (perspective* OR view* OR opinion* OR experienc* OR attitude* OR "Know"))                                                                                                                                   |                                                                                                                                                                     |           |
| #8                                                                                                                                                                                                                         | TITLE-ABS-KEY ("health personnel")                                                                                                                                  | 155,498   |
| #9                                                                                                                                                                                                                         | TITLE-ABS-KEY ("health care provider*")                                                                                                                             | 39,333    |
| #10                                                                                                                                                                                                                        | TITLE-ABS-KEY ("primary health care")                                                                                                                               | 99,180    |
| #11                                                                                                                                                                                                                        | TITLE-ABS-KEY ("physician*")                                                                                                                                        | 637,094   |
| #12                                                                                                                                                                                                                        | TITLE-ABS-KEY ("nurs*")                                                                                                                                             | 732,387   |
| #13                                                                                                                                                                                                                        | TITLE-ABS-KEY ("nursing care")                                                                                                                                      | 48,413    |
| #14                                                                                                                                                                                                                        | TITLE-ABS-KEY ("nurs* role")                                                                                                                                        | 43,330    |
| #15                                                                                                                                                                                                                        | TITLE-ABS-KEY ("physician* role")                                                                                                                                   | 23,728    |
| #16                                                                                                                                                                                                                        | TITLE-ABS-KEY ("professional-patient relations*")                                                                                                                   | 34,543    |
| #17                                                                                                                                                                                                                        | TITLE-ABS-KEY ("parents")                                                                                                                                           | 519,894   |
| #18                                                                                                                                                                                                                        | OR #8 - #17                                                                                                                                                         | 1,970,031 |
| (TITLE-ABS-KEY ("Health Personnel" OR "health care provider*" OR "Primary Health Care" OR "Physician*" OR Nurs* OR "Nursing Care" OR "Nurs* Role" OR "Physician* Role" OR "Professional-Patient Relations*" OR "Parents")) |                                                                                                                                                                     |           |
| #19                                                                                                                                                                                                                        | TITLE-ABS-KEY (vaccin* OR immunis* OR immuniz*) AND (anti-vaccin* OR Rejection OR refus* OR mandatory OR criticis* OR hesitanc* OR doubt* OR refrain OR opposition) | 29,249    |

|                                                                                                                                                                                                                                                                                                                                                                                                                                                                                                                                                                                                                                                                                                                                                      |                                              |           |
|------------------------------------------------------------------------------------------------------------------------------------------------------------------------------------------------------------------------------------------------------------------------------------------------------------------------------------------------------------------------------------------------------------------------------------------------------------------------------------------------------------------------------------------------------------------------------------------------------------------------------------------------------------------------------------------------------------------------------------------------------|----------------------------------------------|-----------|
| #20                                                                                                                                                                                                                                                                                                                                                                                                                                                                                                                                                                                                                                                                                                                                                  | TITLE-ABS-KEY ("anti-vaccination movement*") | 192       |
| #21                                                                                                                                                                                                                                                                                                                                                                                                                                                                                                                                                                                                                                                                                                                                                  | TITLE-ABS-KEY ("non-vaccination*")           | 337       |
| #22                                                                                                                                                                                                                                                                                                                                                                                                                                                                                                                                                                                                                                                                                                                                                  | OR #19 - #21                                 | 29,490    |
| (TITLE-ABS-KEY (((vaccin* OR immunis* OR immuniz*) AND (anti-vaccin* OR Rejection OR refus* OR mandatory OR criticis* OR hesitanc* OR doubt* OR refrain OR opposition)) OR "Anti-Vaccination Movement*" OR "non-vaccination*"))                                                                                                                                                                                                                                                                                                                                                                                                                                                                                                                      |                                              |           |
| #23                                                                                                                                                                                                                                                                                                                                                                                                                                                                                                                                                                                                                                                                                                                                                  | TITLE-ABS-KEY ("qualitative research")       | 108,963   |
| #24                                                                                                                                                                                                                                                                                                                                                                                                                                                                                                                                                                                                                                                                                                                                                  | TITLE-ABS-KEY ("qualitative")                | 626,075   |
| #25                                                                                                                                                                                                                                                                                                                                                                                                                                                                                                                                                                                                                                                                                                                                                  | TITLE-ABS-KEY ("phenomenolog*")              | 126,659   |
| #26                                                                                                                                                                                                                                                                                                                                                                                                                                                                                                                                                                                                                                                                                                                                                  | TITLE-ABS-KEY ("grounded theory")            | 22,689    |
| #27                                                                                                                                                                                                                                                                                                                                                                                                                                                                                                                                                                                                                                                                                                                                                  | TITLE-ABS-KEY ("ethnograph*")                | 70,737    |
| #28                                                                                                                                                                                                                                                                                                                                                                                                                                                                                                                                                                                                                                                                                                                                                  | TITLE-ABS-KEY ("interview*")                 | 694,922   |
| #29                                                                                                                                                                                                                                                                                                                                                                                                                                                                                                                                                                                                                                                                                                                                                  | TITLE-ABS-KEY ("focus group*")               | 83,652    |
| #30                                                                                                                                                                                                                                                                                                                                                                                                                                                                                                                                                                                                                                                                                                                                                  | TITLE-ABS-KEY ("narration")                  | 14,256    |
| #31                                                                                                                                                                                                                                                                                                                                                                                                                                                                                                                                                                                                                                                                                                                                                  | TITLE-ABS-KEY ("narrative*")                 | 167,635   |
| #32                                                                                                                                                                                                                                                                                                                                                                                                                                                                                                                                                                                                                                                                                                                                                  | OR #23 - #31                                 | 1,502,863 |
| (TITLE-ABS-KEY ("Qualitative Research" OR "qualitative" OR "phenomenolog*" OR "grounded theory" OR "ethnograph*" OR "interview*" OR "focus group*" OR "Narration" OR "narrative*"))                                                                                                                                                                                                                                                                                                                                                                                                                                                                                                                                                                  |                                              |           |
| TITLE-ABS-KEY #7 AND TITLE-ABS-KEY #18 AND TITLE-ABS-KEY #22 AND TITLE-ABS-KEY #32                                                                                                                                                                                                                                                                                                                                                                                                                                                                                                                                                                                                                                                                   |                                              |           |
| Limits: Language: English, Portuguese and Spanish.                                                                                                                                                                                                                                                                                                                                                                                                                                                                                                                                                                                                                                                                                                   |                                              |           |
| (TITLE-ABS-KEY (perspective* OR view* OR opinion* OR experienc* OR attitude* OR "Know")) AND (TITLE-ABS-KEY ("Health Personnel" OR "health care provider*" OR "Primary Health Care" OR "Physician*" OR "nurs*" OR "Nursing Care" OR "Nurs* Role" OR "Physician* Role" OR "Professional-Patient Relations*" OR "Parents")) AND (TITLE-ABS-KEY ((vaccin* OR immunis* OR immuniz* AND (anti-vaccin* OR rejection OR refus* OR mandatory OR criticis* OR hesitanc* OR doubt* OR refrain OR opposition )) OR "Anti-Vaccination Movement*" OR "non-vaccination*")) AND (TITLE-ABS-KEY ("Qualitative Research" OR "qualitative" OR "phenomenolog*" OR "grounded theory" OR "ethnograph*" OR "interview*" OR "focus group*" OR "Narration" OR "narrative*")) |                                              |           |
| <b>TOTAL: 335</b>                                                                                                                                                                                                                                                                                                                                                                                                                                                                                                                                                                                                                                                                                                                                    |                                              |           |

|                                                                                                                                                                                                                            |                                                                                                                                                         |                                                                                      |
|----------------------------------------------------------------------------------------------------------------------------------------------------------------------------------------------------------------------------|---------------------------------------------------------------------------------------------------------------------------------------------------------|--------------------------------------------------------------------------------------|
| CINAHL                                                                                                                                                                                                                     |                                                                                                                                                         |  |
| #1                                                                                                                                                                                                                         | "perspective*"                                                                                                                                          | 119,996                                                                              |
| #2                                                                                                                                                                                                                         | "view*"                                                                                                                                                 | 113,755                                                                              |
| #3                                                                                                                                                                                                                         | "opinion*"                                                                                                                                              | 36,918                                                                               |
| #4                                                                                                                                                                                                                         | "experienc*"                                                                                                                                            | 399,159                                                                              |
| #5                                                                                                                                                                                                                         | (MH "Attitude of Health Personnel")                                                                                                                     | 39,379                                                                               |
| #6                                                                                                                                                                                                                         | (MH "Parental Attitudes")                                                                                                                               | 11,114                                                                               |
| #7                                                                                                                                                                                                                         | "Know"                                                                                                                                                  | 37,524                                                                               |
| #8                                                                                                                                                                                                                         | OR TX #1 - #7                                                                                                                                           | 935,084                                                                              |
| <b>TX perspective* OR view* OR opinion* OR experienc* OR (MH "Attitude of Health Personnel") OR (MH "Parental Attitudes") OR "Know"</b>                                                                                    |                                                                                                                                                         |                                                                                      |
| #9                                                                                                                                                                                                                         | (MH "Nurses")                                                                                                                                           | 55,762                                                                               |
| #10                                                                                                                                                                                                                        | "Nursing"                                                                                                                                               | 608,114                                                                              |
| #11                                                                                                                                                                                                                        | (MH "Nursing Role")                                                                                                                                     | 49,300                                                                               |
| #12                                                                                                                                                                                                                        | (MH "Nurse-Patient Relations")                                                                                                                          | 23,569                                                                               |
| #13                                                                                                                                                                                                                        | (MH "Professional-Patient Relations+")                                                                                                                  | 83,515                                                                               |
| #14                                                                                                                                                                                                                        | (MH "Health Personnel+")                                                                                                                                | 500,601                                                                              |
| #15                                                                                                                                                                                                                        | (MH "Physicians")                                                                                                                                       | 54,263                                                                               |
| #16                                                                                                                                                                                                                        | (MH "Parents")                                                                                                                                          | 38,262                                                                               |
| #17                                                                                                                                                                                                                        | OR TX #9 - #16                                                                                                                                          | 1,037,263                                                                            |
| <b>TX (MH "Nurses") OR "Nursing" OR (MH "Nursing Role") OR (MH "Nurse-Patient Relations") OR (MH "Professional-Patient Relations+") OR (MH "Health Personnel+") OR (MH "Physicians") OR (MH "Parents")</b>                 |                                                                                                                                                         |                                                                                      |
| #18                                                                                                                                                                                                                        | ((vaccin* OR immunis* OR immuniz*) AND (anti-vaccin* OR refus* OR Rejection OR mandatory OR criticis* OR hesitanc* OR doubt* OR refrain OR opposition)) | 2,095                                                                                |
| #19                                                                                                                                                                                                                        | (MH "Anti-Vaccination Movement")                                                                                                                        | 73                                                                                   |
| #20                                                                                                                                                                                                                        | "non vaccination"                                                                                                                                       | 349                                                                                  |
| #21                                                                                                                                                                                                                        | OR TX #18 - #20                                                                                                                                         | 2,156                                                                                |
| <b>TX ((vaccin* OR immunis* OR immuniz*) AND (anti-vaccin* OR refus* OR Rejection OR mandatory OR criticis* OR hesitanc* OR doubt* OR refrain OR opposition)) OR (MH "Anti-Vaccination Movement") OR "non vaccination"</b> |                                                                                                                                                         |                                                                                      |
| #22                                                                                                                                                                                                                        | (MH "Qualitative Studies+")                                                                                                                             | 131,545                                                                              |
| #23                                                                                                                                                                                                                        | "qualitative"                                                                                                                                           | 153,274                                                                              |

|                                                                                                                                                                                                                                                                                                                                                                                                                                                                                                                                                                                                                                                                                               |                     |         |
|-----------------------------------------------------------------------------------------------------------------------------------------------------------------------------------------------------------------------------------------------------------------------------------------------------------------------------------------------------------------------------------------------------------------------------------------------------------------------------------------------------------------------------------------------------------------------------------------------------------------------------------------------------------------------------------------------|---------------------|---------|
| #24                                                                                                                                                                                                                                                                                                                                                                                                                                                                                                                                                                                                                                                                                           | (MH "Interviews+")  | 202,760 |
| #24                                                                                                                                                                                                                                                                                                                                                                                                                                                                                                                                                                                                                                                                                           | (MM "Focus Groups") | 698     |
| #25                                                                                                                                                                                                                                                                                                                                                                                                                                                                                                                                                                                                                                                                                           | (MH "Narratives")   | 16,099  |
| #26                                                                                                                                                                                                                                                                                                                                                                                                                                                                                                                                                                                                                                                                                           | OR TX #22 - #25     | 297,525 |
| <b>TX (MH "Qualitative Studies+") OR "qualitative" OR (MH "Interviews+") OR (MM "Focus Groups") OR (MH "Narratives")</b>                                                                                                                                                                                                                                                                                                                                                                                                                                                                                                                                                                      |                     |         |
| TX #8 AND TX #17 AND TX #21 AND TX #26                                                                                                                                                                                                                                                                                                                                                                                                                                                                                                                                                                                                                                                        |                     |         |
| Limits: Language: English and Portuguese.                                                                                                                                                                                                                                                                                                                                                                                                                                                                                                                                                                                                                                                     |                     |         |
| <b>TX perspective* OR view* OR opinion* OR experienc* OR (MH "Attitude of Health Personnel") OR (MH "Parental Attitudes") OR "Know" AND TX (MH "Nurses") OR "Nursing" OR (MH "Nursing Role") OR (MH "Nurse-Patient Relations") OR (MH "Professional-Patient Relations+") OR (MH "Health Personnel+") OR (MH "Physicians") OR (MH "Parents") AND TX ((vaccin* OR immunis* OR immuniz*) AND (anti-vaccin* OR refus* OR Rejection OR mandatory OR criticis* OR hesitanc* OR doubt* OR refrain OR opposition)) OR (MH "Anti-Vaccination Movement") OR "non vaccination" AND TX (MH "Qualitative Studies+") OR "qualitative" OR (MH "Interviews+") OR (MM "Focus Groups") OR (MH "Narratives")</b> |                     |         |
| <b>TOTAL: 92</b>                                                                                                                                                                                                                                                                                                                                                                                                                                                                                                                                                                                                                                                                              |                     |         |

| WEB OF SCIENCE                                                                                                                                                                                                                                                                                                                                                      |                                                                                                                                                         | WEB OF SCIENCE™ |
|---------------------------------------------------------------------------------------------------------------------------------------------------------------------------------------------------------------------------------------------------------------------------------------------------------------------------------------------------------------------|---------------------------------------------------------------------------------------------------------------------------------------------------------|-----------------|
| #1                                                                                                                                                                                                                                                                                                                                                                  | "perspective*"                                                                                                                                          | 275             |
| #2                                                                                                                                                                                                                                                                                                                                                                  | "view*"                                                                                                                                                 | 5,034,649       |
| #3                                                                                                                                                                                                                                                                                                                                                                  | "opinion*"                                                                                                                                              | 162,215         |
| #4                                                                                                                                                                                                                                                                                                                                                                  | "experienc*"                                                                                                                                            | 1,713,296       |
| #5                                                                                                                                                                                                                                                                                                                                                                  | "attitude"                                                                                                                                              | 117,985         |
| #6                                                                                                                                                                                                                                                                                                                                                                  | "know"                                                                                                                                                  | 170,983         |
| #7                                                                                                                                                                                                                                                                                                                                                                  | OR #1 - #6                                                                                                                                              | 3,059,918       |
| <b>TX (perspective* OR view* OR opinion* OR experienc* OR attitude OR "Know")</b>                                                                                                                                                                                                                                                                                   |                                                                                                                                                         |                 |
| #8                                                                                                                                                                                                                                                                                                                                                                  | "Health Personnel"                                                                                                                                      | 160,915         |
| #9                                                                                                                                                                                                                                                                                                                                                                  | "health care provider*"                                                                                                                                 | 40,014          |
| #10                                                                                                                                                                                                                                                                                                                                                                 | "Primary Health Care"                                                                                                                                   | 98,979          |
| #11                                                                                                                                                                                                                                                                                                                                                                 | "Physician*"                                                                                                                                            | 603,965         |
| #12                                                                                                                                                                                                                                                                                                                                                                 | Nurs*                                                                                                                                                   | 799,841         |
| #13                                                                                                                                                                                                                                                                                                                                                                 | "Nursing Care"                                                                                                                                          | 47,246          |
| #14                                                                                                                                                                                                                                                                                                                                                                 | "Nurs* Role"                                                                                                                                            | 3,088           |
| #15                                                                                                                                                                                                                                                                                                                                                                 | "Physician* Role"                                                                                                                                       | 709             |
| #16                                                                                                                                                                                                                                                                                                                                                                 | "Professional-Patient Relations*"                                                                                                                       | 38,459          |
| #17                                                                                                                                                                                                                                                                                                                                                                 | "Parents"                                                                                                                                               | 300,649         |
| #18                                                                                                                                                                                                                                                                                                                                                                 | OR #8 - #17                                                                                                                                             | 1,798,944       |
| <b>TX ("Health Personnel" OR "health care provider*" OR "Primary Health Care" OR "Physician*" OR Nurs* OR "Nursing Care" OR "Nurs* Role" OR "Physician* Role" OR "Professional-Patient Relations*" OR "Parents")</b>                                                                                                                                                |                                                                                                                                                         |                 |
| #19                                                                                                                                                                                                                                                                                                                                                                 | ((vaccin* OR immunis* OR immuniz*) AND (anti-vaccin* OR Rejection OR refus* OR mandatory OR criticis* OR hesitanc* OR doubt* OR refrain OR opposition)) | 16,645          |
| #20                                                                                                                                                                                                                                                                                                                                                                 | "Anti-Vaccination Movement"                                                                                                                             | 113             |
| #21                                                                                                                                                                                                                                                                                                                                                                 | "non-vaccination"                                                                                                                                       | 383             |
| #22                                                                                                                                                                                                                                                                                                                                                                 | OR #19 - #21                                                                                                                                            | 16,990          |
| <b>TX (((vaccin* OR immunis* OR immuniz*) AND (anti-vaccin* OR Rejection OR refus* OR mandatory OR criticis* OR hesitanc* OR doubt* OR refrain OR opposition)) OR "Anti-Vaccination Movement" OR "non-vaccination")</b>                                                                                                                                             |                                                                                                                                                         |                 |
| #23                                                                                                                                                                                                                                                                                                                                                                 | "Qualitative Research"                                                                                                                                  | 96,230          |
| #24                                                                                                                                                                                                                                                                                                                                                                 | "qualitative"                                                                                                                                           | 570,551         |
| #24                                                                                                                                                                                                                                                                                                                                                                 | "phenomenolog*"                                                                                                                                         | 187,441         |
| #25                                                                                                                                                                                                                                                                                                                                                                 | "grounded theory"                                                                                                                                       | 20,838          |
| #26                                                                                                                                                                                                                                                                                                                                                                 | "ethnograph*"                                                                                                                                           | 61,151          |
| #27                                                                                                                                                                                                                                                                                                                                                                 | "interview*"                                                                                                                                            | 643,788         |
| #28                                                                                                                                                                                                                                                                                                                                                                 | "focus group*"                                                                                                                                          | 78,142          |
| #29                                                                                                                                                                                                                                                                                                                                                                 | "Narration"                                                                                                                                             | 14,110          |
| #30                                                                                                                                                                                                                                                                                                                                                                 | "narrative*"                                                                                                                                            | 161,139         |
| #31                                                                                                                                                                                                                                                                                                                                                                 | OR #23 - #30                                                                                                                                            | 1,451,788       |
| <b>TX ("Qualitative Research" OR "qualitative" OR "phenomenolog*" OR "grounded theory" OR "ethnograph*" OR "interview*" OR "focus group*" OR "Narration" OR "narrative*")</b>                                                                                                                                                                                       |                                                                                                                                                         |                 |
| TEMA: #7 AND TEMA: #18 AND TEMA: #22 AND TEMA: #31                                                                                                                                                                                                                                                                                                                  |                                                                                                                                                         |                 |
| Limits: Language: English, Portuguese and Spanish.                                                                                                                                                                                                                                                                                                                  |                                                                                                                                                         |                 |
| <b>TX (perspective* OR view* OR opinion* OR experienc* OR attitude OR "Know") AND TX ("Health Personnel" OR "health care provider*" OR "Primary Health Care" OR "Physician*" OR Nurs* OR "Nursing Care" OR "Nurs* Role" OR "Physician* Role" OR "Professional-Patient Relations*" OR "Parents") AND TX (((vaccin* OR immunis* OR immuniz*) AND (anti-vaccin* OR</b> |                                                                                                                                                         |                 |

|                                                                                                                                                                                                                                                                                                                                 |
|---------------------------------------------------------------------------------------------------------------------------------------------------------------------------------------------------------------------------------------------------------------------------------------------------------------------------------|
| Rejection OR refus* OR mandatory OR criticis* OR hesitanc* OR doubt* OR refrain OR opposition)) OR "Anti-Vaccination Movement" OR "non-vaccination") AND TX ("Qualitative Research" OR "qualitative" OR "phenomenolog*" OR "grounded theory" OR "ethnograph*" OR "interview*" OR "focus group*" OR "Narration" OR "narrative*") |
| TOTAL: 368                                                                                                                                                                                                                                                                                                                      |

| PSYCINFO | ProQuest                                                                                                                                                                                                                                                                                                                                                                                                                                                                                                                                                                                                                                                                                                                     |
|----------|------------------------------------------------------------------------------------------------------------------------------------------------------------------------------------------------------------------------------------------------------------------------------------------------------------------------------------------------------------------------------------------------------------------------------------------------------------------------------------------------------------------------------------------------------------------------------------------------------------------------------------------------------------------------------------------------------------------------------|
| #1       | ((("Parent*" OR "Nurs*" OR "professional") AND (perspective*))                                                                                                                                                                                                                                                                                                                                                                                                                                                                                                                                                                                                                                                               |
| #2       | view*                                                                                                                                                                                                                                                                                                                                                                                                                                                                                                                                                                                                                                                                                                                        |
| #3       | opinion*                                                                                                                                                                                                                                                                                                                                                                                                                                                                                                                                                                                                                                                                                                                     |
| #4       | experienc*                                                                                                                                                                                                                                                                                                                                                                                                                                                                                                                                                                                                                                                                                                                   |
| #5       | attitude                                                                                                                                                                                                                                                                                                                                                                                                                                                                                                                                                                                                                                                                                                                     |
| #6       | "Know"                                                                                                                                                                                                                                                                                                                                                                                                                                                                                                                                                                                                                                                                                                                       |
| #7       | OR #1 - #6                                                                                                                                                                                                                                                                                                                                                                                                                                                                                                                                                                                                                                                                                                                   |
|          | ((("Parent*" OR "Nurs*" OR "professional") AND (perspective*)) OR view* OR opinion* OR experienc* OR attitude OR "Know"                                                                                                                                                                                                                                                                                                                                                                                                                                                                                                                                                                                                      |
| #8       | "Health Personnel"                                                                                                                                                                                                                                                                                                                                                                                                                                                                                                                                                                                                                                                                                                           |
| #9       | "health care provider*"                                                                                                                                                                                                                                                                                                                                                                                                                                                                                                                                                                                                                                                                                                      |
| #10      | "Primary Health Care"                                                                                                                                                                                                                                                                                                                                                                                                                                                                                                                                                                                                                                                                                                        |
| #11      | "Physician*"                                                                                                                                                                                                                                                                                                                                                                                                                                                                                                                                                                                                                                                                                                                 |
| #12      | Nurs*                                                                                                                                                                                                                                                                                                                                                                                                                                                                                                                                                                                                                                                                                                                        |
| #13      | "Nursing Care"                                                                                                                                                                                                                                                                                                                                                                                                                                                                                                                                                                                                                                                                                                               |
| #14      | "Nurs* Role"                                                                                                                                                                                                                                                                                                                                                                                                                                                                                                                                                                                                                                                                                                                 |
| #15      | "Physician* Role"                                                                                                                                                                                                                                                                                                                                                                                                                                                                                                                                                                                                                                                                                                            |
| #16      | "Professional-Patient Relations*"                                                                                                                                                                                                                                                                                                                                                                                                                                                                                                                                                                                                                                                                                            |
| #16      | "Parents"                                                                                                                                                                                                                                                                                                                                                                                                                                                                                                                                                                                                                                                                                                                    |
| #17      | OR #8 - #16                                                                                                                                                                                                                                                                                                                                                                                                                                                                                                                                                                                                                                                                                                                  |
|          | "Health Personnel" OR "health care provider*" OR "Primary Health Care" OR "Physician*" OR Nurs* OR "Nursing Care" OR "Nurs* Role" OR "Physician* Role" OR "Professional-Patient Relations*" OR "Parents"                                                                                                                                                                                                                                                                                                                                                                                                                                                                                                                     |
| #18      | ((vaccin* OR immunis* OR immuniz*) AND (anti-vaccin* OR Rejection OR refus* OR mandatory OR criticis* OR hesitanc* OR doubt* OR refrain OR opposition))                                                                                                                                                                                                                                                                                                                                                                                                                                                                                                                                                                      |
| #19      | "Anti-Vaccination Movement"                                                                                                                                                                                                                                                                                                                                                                                                                                                                                                                                                                                                                                                                                                  |
| #20      | "non-vaccination"                                                                                                                                                                                                                                                                                                                                                                                                                                                                                                                                                                                                                                                                                                            |
| #21      | OR #18 - #20                                                                                                                                                                                                                                                                                                                                                                                                                                                                                                                                                                                                                                                                                                                 |
|          | ((vaccin* OR immunis* OR immuniz*) AND (anti-vaccin* OR Rejection OR refus* OR mandatory OR criticis* OR hesitanc* OR doubt* OR refrain OR opposition)) OR "Anti-Vaccination Movement" OR "non-vaccination")                                                                                                                                                                                                                                                                                                                                                                                                                                                                                                                 |
| #22      | "Qualitative Research"                                                                                                                                                                                                                                                                                                                                                                                                                                                                                                                                                                                                                                                                                                       |
| #23      | "qualitative"                                                                                                                                                                                                                                                                                                                                                                                                                                                                                                                                                                                                                                                                                                                |
| #24      | "phenomenolog*"                                                                                                                                                                                                                                                                                                                                                                                                                                                                                                                                                                                                                                                                                                              |
| #25      | "grounded theory"                                                                                                                                                                                                                                                                                                                                                                                                                                                                                                                                                                                                                                                                                                            |
| #26      | "ethnograph*"                                                                                                                                                                                                                                                                                                                                                                                                                                                                                                                                                                                                                                                                                                                |
| #27      | "interview*"                                                                                                                                                                                                                                                                                                                                                                                                                                                                                                                                                                                                                                                                                                                 |
| #28      | "focus group*"                                                                                                                                                                                                                                                                                                                                                                                                                                                                                                                                                                                                                                                                                                               |
| #29      | "Narration"                                                                                                                                                                                                                                                                                                                                                                                                                                                                                                                                                                                                                                                                                                                  |
| #30      | "narrative*"                                                                                                                                                                                                                                                                                                                                                                                                                                                                                                                                                                                                                                                                                                                 |
| #31      | OR #22 - #30                                                                                                                                                                                                                                                                                                                                                                                                                                                                                                                                                                                                                                                                                                                 |
|          | "Qualitative Research" OR "qualitative" OR "phenomenolog*" OR "grounded theory" OR "ethnograph*" OR "interview*" OR "focus group*" OR "Narration" OR "narrative*"                                                                                                                                                                                                                                                                                                                                                                                                                                                                                                                                                            |
|          | #7 AND #17 AND #21 AND #31                                                                                                                                                                                                                                                                                                                                                                                                                                                                                                                                                                                                                                                                                                   |
|          | Limits: Scientific Magazine and Language: English, Portuguese and Spanish.                                                                                                                                                                                                                                                                                                                                                                                                                                                                                                                                                                                                                                                   |
|          | ((("Parent*" OR "Nurs*" OR "professional") AND (perspective*)) OR view* OR opinion* OR experienc* OR attitude OR "Know" AND "Health Personnel" OR "health care provider*" OR "Primary Health Care" OR "Physician*" OR Nurs* OR "Nursing Care" OR "Nurs* Role" OR "Physician* Role" OR "Professional-Patient Relations*" OR "Parents" AND (((vaccin* OR immunis* OR immuniz*) AND (anti-vaccin* OR Rejection OR refus* OR mandatory OR criticis* OR hesitanc* OR doubt* OR refrain OR opposition)) OR "Anti-Vaccination Movement" OR "non-vaccination") AND "Qualitative Research" OR "qualitative" OR "phenomenolog*" OR "grounded theory" OR "ethnograph*" OR "interview*" OR "focus group*" OR "Narration" OR "narrative*" |
|          | TOTAL: 54                                                                                                                                                                                                                                                                                                                                                                                                                                                                                                                                                                                                                                                                                                                    |

Table S3 Traslation tables

| Stone Hardness—Resistance to Vaccination                                       |                        |                      |                                                                                                                                 |                                                                                                                                                          |                                     |                      |                               |                                                                                                                                          |                                                                                                              |                      |                              |
|--------------------------------------------------------------------------------|------------------------|----------------------|---------------------------------------------------------------------------------------------------------------------------------|----------------------------------------------------------------------------------------------------------------------------------------------------------|-------------------------------------|----------------------|-------------------------------|------------------------------------------------------------------------------------------------------------------------------------------|--------------------------------------------------------------------------------------------------------------|----------------------|------------------------------|
| (Rudolfsson & Karlsson, 2019)                                                  | (Stretch et al., 2009) | (Omura et al., 2014) | (Jama et al., 2019)                                                                                                             | (Khan & Sahibzada, 2016) *                                                                                                                               | (L. Mollema et al., 2012)           | (Ruijs et al., 2012) | (Maria Gottvall et al., 2011) | (Shahbari et al., 2020)                                                                                                                  | (Navin et al., 2019)                                                                                         | (Berry et al., 2017) | (Bašnáková & Hatoková, 2017) |
| Explain that there is false information about the autism-vaccine relationship. |                        |                      | False belief of autism<br>Parents tell them that they do not want to administer vaccines that make their children stop talking. |                                                                                                                                                          |                                     |                      |                               |                                                                                                                                          |                                                                                                              |                      |                              |
|                                                                                |                        |                      |                                                                                                                                 | Influence of religion<br>Parents listened to religious leaders, who told them that the vaccines were made with the blood of animals prohibited by Islam. | Linked to confidence in homeopathy. |                      |                               | Simulate the behavior of Jesus (who was not vaccinated) and in God's plan.<br>Parents cannot be underestimated from these consultations. | Trust in traditional or complement ary medicine.<br>Greater confidence in these "sciences" than in medicine. |                      |                              |

Strong influence of the pharmaceutical industry and economic interest in changes in immunization programs.

Influence of pharmaceutical companies. Brochures offered to parents to inform them of the facts by large companies.

Very harsh tone, compromised health worker safety.

#### Lack of Modelling Tools—Lack of Resources, Support and Training

| (Rudolfsson & Karlsson, 2019)                                                                 | (Stretch et al., 2009) | (Omura et al., 2014) | (Jama et al., 2019) | (Khan & Sahibzada, 2016) * | (L. Mollema et al., 2012)                                                                                      | (Ruijs et al., 2012) | (Maria Gottvall et al., 2011)                                                        | (Shahbari et al., 2020) | (Navin et al., 2019) | (Berry et al., 2017) | (Bašnáková & Hatoková, 2017) |
|-----------------------------------------------------------------------------------------------|------------------------|----------------------|---------------------|----------------------------|----------------------------------------------------------------------------------------------------------------|----------------------|--------------------------------------------------------------------------------------|-------------------------|----------------------|----------------------|------------------------------|
| Lack of training of professionals on vaccination. Lack of training with well-trained parents. |                        |                      |                     |                            | Need for up-to-date training on vaccines, and global epidemics. Know how to anticipate questions from parents. |                      | Lack of knowledge about the HPV vaccine. Nurses request the same guidelines for all. |                         |                      |                      |                              |

---

|                                                                                                                 |                                                                                                                     |                                                                |                                                                 |
|-----------------------------------------------------------------------------------------------------------------|---------------------------------------------------------------------------------------------------------------------|----------------------------------------------------------------|-----------------------------------------------------------------|
|                                                                                                                 | Many changes in some vaccines.                                                                                      |                                                                | Constant changes in vaccination programs. Alternative calendars |
| Little coordination between doctors and public health.                                                          | Vaccine staff have their own opinion about vaccines and changes, but are not asked. They have to accept everything. | Lack of recognition of health professionals .                  |                                                                 |
| Loss of commitment to physicians regarding vaccination                                                          |                                                                                                                     | Desire to be involved in the planning of vaccination programs. |                                                                 |
|                                                                                                                 |                                                                                                                     | Nursing own voice.                                             |                                                                 |
| Lack of time and high workload.                                                                                 | Little time to talk to parents about vaccines in the consultation.                                                  |                                                                |                                                                 |
| Process that takes a long time, informing parents, vaccinating, answering questions, examining a minor, etc ... | Need to do health checks for the elderly.                                                                           |                                                                |                                                                 |

---

Unfair  
economic  
remuneration.

#### Rudimentary Sculpting—Using Personal Strategies

| (Rudolfsson & Karlsson, 2019)                                                          | (Stretch et al., 2009)                                                                                       | (Omura et al., 2014) | (Jama et al., 2019) | (Khan & Sahibzada, 2016) * | (L. Mollema et al., 2012)                                                                                               | (Ruijs et al., 2012) | (Maria Gottvall et al., 2011) | (Shahbari et al., 2020)                                   | (Navin et al., 2019)                                                                | (Berry et al., 2017) | (Bašnáková & Hatoková, 2017)                                                     |
|----------------------------------------------------------------------------------------|--------------------------------------------------------------------------------------------------------------|----------------------|---------------------|----------------------------|-------------------------------------------------------------------------------------------------------------------------|----------------------|-------------------------------|-----------------------------------------------------------|-------------------------------------------------------------------------------------|----------------------|----------------------------------------------------------------------------------|
|                                                                                        | Personal conflict between the personal and professional part. Nurses who would not vaccinate their children. |                      |                     |                            | Management of responsibility and feelings for professionals .<br>One cannot be a health worker and be against vaccines. |                      |                               | Differences of opinion in some doctors, who were against. |                                                                                     |                      | Handling personal failure after failing to get vaccinated with hesitant parents. |
| Avoid judging and criticizing the ideas and opinions of parents. Accept their decision | Vaccines are positive, but it is necessary to listen to parents who reject them.                             |                      |                     |                            | Respect the parents' decision, and have empathy.                                                                        |                      |                               |                                                           | Importance of respecting the values of parents, even when they refuse to vaccinate. |                      | Provide enough information to the parents and then leave the final decision      |

---

|                              |                                                                                                        |                                                                                                                      |  |                                                                                                                    |                                                                                                                        |
|------------------------------|--------------------------------------------------------------------------------------------------------|----------------------------------------------------------------------------------------------------------------------|--|--------------------------------------------------------------------------------------------------------------------|------------------------------------------------------------------------------------------------------------------------|
| even if they are against it. | The opinions of the parents must be valued.                                                            |                                                                                                                      |  |                                                                                                                    | to the parents.                                                                                                        |
|                              | I do not wish to break trust with parents, as they will have to deal with those parents in the future. | Establishment of a doctor-patient trust relationship for all health plans, including vaccines.                       |  | Related to the maintenance of the therapeutic relationship. Even forgo vaccination if the relationship is at risk. | Lack of trust affects all parental decisions. Depending on the type of parents, one strategy or another will be chosen |
|                              |                                                                                                        | Provide medical information. Explain the risks of diseases, adverse effects, and the positive effect of vaccination. |  |                                                                                                                    |                                                                                                                        |

---
